# Supplementary material for: Development and validation of an algorithm to estimate the risk of severe complications of COVID-19 to prioritise vaccination
Source: bioRxiv or medRxiv preprint supplement (doi:10.1101/2021.02.05.21251197), 2021-02-08
Supplement: Supplementary file [file media-1.pdf]

## Appendix A: Characteristics and risk factors selected for the development of the sCOVID prediction model

| Type of data                                               | Characteristic                                      | ICPC/<br>Diagnostic<br>code/ ATC |
|------------------------------------------------------------|-----------------------------------------------------|----------------------------------|
| <b>Demographic</b>                                         | Age in years (continuous)                           |                                  |
|                                                            | Sex                                                 |                                  |
|                                                            | NDS (Area postal level)                             |                                  |
|                                                            | Postal code (4 – digits)                            |                                  |
| <b>Lifestyle</b>                                           |                                                     |                                  |
| <i>Obesity</i>                                             | Obesity (BMI $\geq$ 30 kg/m <sup>2</sup> )          | T82                              |
|                                                            | BMI $\geq$ 30 kg/m <sup>2</sup> in the last 2 years | 1272                             |
| <b>COVID-19 (Information extracted from questionnaire)</b> |                                                     |                                  |
| <i>Current Status</i>                                      | Clinical suspicion (not tested)                     |                                  |
|                                                            | COVID-19 test positive (any)                        |                                  |
| <i>Severity</i>                                            | Hospitalisation                                     |                                  |
|                                                            | Institutionalisation                                |                                  |
|                                                            | Deceased                                            |                                  |
| <i>Time period</i>                                         | First wave (March - August 2020)                    |                                  |
|                                                            | Second wave (September-December 2020)               |                                  |
| <b>Chronic Diseases (CMS: score 0- 9)*</b>                 |                                                     |                                  |
| <i>Cardiovascular</i>                                      | Ischaemic heart disease with angina                 | K74                              |
|                                                            | Unstable angina                                     | K74.01                           |
|                                                            | Stable angina                                       | K74.02                           |
|                                                            | Acute myocardial infarction                         | K75                              |
|                                                            | Ischaemic heart disease without angina              | K76                              |
|                                                            | Coronary sclerosis                                  | K76.01                           |
|                                                            | Old heart attack                                    | K76.02                           |
|                                                            | Heart failure                                       | K77                              |
|                                                            | Acute heart failure                                 | K77.01                           |
|                                                            | Chronic heart failure                               | K77.02                           |
|                                                            | Atrial fibrillation/flutter                         | K78                              |
|                                                            | Transient cerebral ischaemia                        | K89                              |
|                                                            | Stroke/cerebrovascular accident                     | K90                              |
|                                                            | Subarachnoid hemorrhage                             | K90.01                           |
|                                                            | Intracerebral haemorrhage                           | K90.02                           |
|                                                            | Cerebral Infarction                                 | K90.03                           |
|                                                            | Cerebrovascular disease                             | K91                              |
|                                                            | Hypertension uncomplicated                          | K86                              |
|                                                            | Hypertension complicated                            | K87                              |
|                                                            | Paroxysmal tachycardia                              | K79                              |
|                                                            | Supraventricular tachycardia                        | K79.01                           |

|                     |                                             |        |
|---------------------|---------------------------------------------|--------|
|                     | Ventricular tachycardia                     | K79.02 |
|                     | Congenital anomaly cardiovascular           | K73    |
|                     | Atrial septal defect                        | K73.01 |
|                     | Ventricular septal defect                   | K73.02 |
|                     | Heart disease other                         | K84    |
|                     | Wolff-Parkinson-White (WPW) syndrome        | K84.01 |
|                     | Atrioventricular block                      | K84.02 |
|                     | Cardiomyopathy                              | K84.03 |
|                     | Long QT syndrome                            | K84.07 |
|                     | Atherosclerosis/peripheral vascular disease | K92    |
|                     | Intermittent claudication                   | K92.01 |
|                     | Raynaud syndrome                            | K92.02 |
|                     | Buerger's disease                           | K92.03 |
|                     | Cardiac arrhythmia NOS                      | K80    |
|                     | Supraventricular extrasystoles              | K80.01 |
|                     | Ventricular extrasystoles                   | K80.02 |
|                     | Sick sinus syndrome                         | K80.03 |
|                     | Pulmonary heart disease                     | K82    |
| <i>Diabetes</i>     | Diabetes non-insulin dependent              | T90    |
|                     | Diabetes mellitus type 1                    | T90.01 |
|                     | Diabetes mellitus type 2                    | T90.02 |
| <i>Neurological</i> | Dementia                                    | P70    |
|                     | Parkinsonism                                | N87    |
|                     | Parkinson's disease                         | N87.01 |
|                     | Epilepsy                                    | N88    |
|                     | Multiple sclerosis                          | N86    |
|                     | Neurological disease other                  | N99    |
|                     | ALS                                         | N99.01 |
|                     | Myasthenia                                  | N99.02 |
|                     | Other neuron muscle diseases                | N99.03 |
| <i>Heart valve</i>  | Rheumatic fever/heart disease               | K71    |
|                     | Rheumatic and heart disease                 | K71.02 |
|                     | Heart valve disease NOS                     | K83    |
|                     | Stenosis of aorta                           | K83.01 |
|                     | Mitral insufficiency                        | K83.02 |
| <i>Liver</i>        | Liver disease NOS                           | D97    |
|                     | Cirrhosis                                   | D97.04 |
|                     | Liver steatosis (< 5 years)                 | D97.05 |
|                     | Viral hepatitis                             | D72    |
|                     | Viral hepatitis A (< 6 month)               | D72.01 |
|                     | Viral hepatitis B (< 6 month)               | D72.02 |
|                     | Viral hepatitis C (< 6 month)               | D72.03 |
|                     | Carrier Hepatitis B                         | D72.04 |
|                     | Carrier Hepatitis C                         | D72.05 |

|               |                                         |         |
|---------------|-----------------------------------------|---------|
| <i>Lung</i>   | Chronic obstructive pulmonary disease   | R95     |
|               | Astma                                   | R96     |
|               | Allergic astma                          | R96.02  |
|               | Chronic bronchitis                      | R91     |
|               | Chronic bronchitis                      | R91.01  |
|               | Bronchiectasis                          | R91.02  |
|               | Pulmonary embolism                      | K93     |
|               | Tuberculosis                            | R70     |
|               | Pleurisy/pleural effusion               | R82     |
|               | Congenital anomaly respiratory          | R89     |
|               | Respiratory disease other               | R99     |
|               | Pneumoconiosis                          | R99.06  |
|               | Cystic fibrosis                         | T99.10  |
|               | GOLD classification (<24 month)         | 2209    |
|               | Nr of exacerbations (<12 month)         | 3549    |
|               | Prednisolone (<24 month)                | H02AB06 |
|               | Prednisone (<24 month)                  | H02AB07 |
| <i>Cancer</i> | Malignant neoplasm breast female        | X76     |
|               | Malignant Adenocarcinoma                | X76.01  |
|               | Malignant neoplasm male genital other   | Y78     |
|               | Malignant carcinoma penis               | Y78.01  |
|               | Malignant carcinoma testis              | Y78.02  |
|               | Malignant carcinoma breast              | Y78.03  |
|               | Malignant neoplasm nervous system       | N74     |
|               | Malignant neoplasm of bladder           | U76     |
|               | Malignant neoplasm thyroid              | T71     |
|               | Malignant neoplasm pancreas             | D76     |
|               | Malignant neoplasm stomach              | D74     |
|               | Malignant neoplasm related to pregnancy | W72     |
|               | Malignant neoplasm urinary tract other  | U77     |
|               | Malignant neoplasm of kidney            | U75     |
|               | Malignant neoplasm colon/rectum         | D75     |
|               | Malignancy NOS                          | A79     |
|               | Malignant neoplasm cervix               | X75     |
|               | Malignant neoplasm bronchus/lung        | R84     |
|               | Malignant neoplasm blood other          | B74     |
|               | Multiple myeloma                        | B74.01  |
|               | Malignant neoplasm genital female other | X77     |
|               | Endometrial carcinoma                   | X77.01  |
|               | Malignant ovary carcinoma               | X77.02  |
|               | Malignant neoplasm of skin              | S77     |
|               | Basal cell carcinoma                    | S77.01  |
|               | Spino-cellular carcinoma                | S77.02  |
|               | Malignant melanoma                      | S77.03  |

|                                                         |                                                    |         |
|---------------------------------------------------------|----------------------------------------------------|---------|
|                                                         | Kaposi's sarcoma                                   | S77.04  |
|                                                         | Malignant neoplasm respiratory other               | R85     |
|                                                         | Benign neoplasm respiratory                        | R86     |
|                                                         | Hodgkin Lymphoma                                   | B72     |
|                                                         | Hodgkin Lymphoma                                   | B72.01  |
|                                                         | Non-hodgkin Lymphoma                               | B72.02  |
|                                                         | Leukaemia                                          | B73     |
| <i>Kidney</i>                                           | Congenital anomaly urinary tract                   | U85     |
|                                                         | Polycystic kidney disease                          | U85.01  |
|                                                         | Glomerulonephritis/nephrosis                       | U88     |
|                                                         | Urinary disease other                              | U99     |
|                                                         | Chronic kidney disease                             | U99.01  |
|                                                         | Renal hypoplasia                                   | U99.02  |
|                                                         | Hydronephrosis                                     | U99.03  |
|                                                         | Creatin clearance (CKD-EPI) <30 (< 12 months)      | 3583    |
|                                                         | Creatin clearance (MDRD) <30 (< 12 months) or      | 1919    |
|                                                         | Creatin clearance (COCKCROFT) <30 (< 12 months) or | 1918    |
|                                                         | Creatin clearance (< 12 months)                    | 524     |
| <i>Immune system</i>                                    | HIV-infection/AIDS                                 | B90     |
|                                                         | Seropositive without symptoms                      | B90.01  |
|                                                         | HIV                                                | B90.02  |
|                                                         | Immunodeficiencies                                 | T99.01  |
|                                                         | Prednison/prednisolon (< 6 months)                 | H02A*   |
|                                                         | Oncolytics (< 6 months)                            | L01*    |
|                                                         | Immunosuppressants (< 6 months)                    | L04A*   |
|                                                         | TNF-Alpha (< 6 months)                             | L04AB01 |
|                                                         | Interleukine inhibitors (< 6 months)               | L04AC   |
| <b>Indication for influenza vaccination (score 0-1)</b> |                                                    |         |
|                                                         | Diabetes                                           |         |
|                                                         | Cardiovascular disease                             |         |
|                                                         | Lung disease                                       |         |
|                                                         | Kidney disease                                     |         |
|                                                         | Immunosuppressive disease/immunosuppressants       |         |
|                                                         | Heart valve disease                                |         |
|                                                         | Cirrhosis                                          | D97.04  |
|                                                         | Liver disease NOS                                  | D97     |
|                                                         | Congenital anomaly NOS/multiple                    | A90     |
|                                                         | Down syndrome                                      | A90.01  |
|                                                         | Ruptured spleen traumatic                          | B76     |
|                                                         | Hereditary hemolytic anemia                        | B78     |
|                                                         | Sikkelcell anemia                                  | B78.02  |
|                                                         | Congenital anomaly musculoskeletal                 | L82     |
|                                                         | Acquired deformity of the spine                    | L85     |

|                                               |        |
|-----------------------------------------------|--------|
| Scoliosis                                     | L85.01 |
| Endocrine/metabolic/nutritional disease other | T99    |
| Cushing syndrome                              | T99.08 |
| Addison syndrome                              | T99.09 |
| Adrenal insufficiency                         | T99.12 |
| Adreno-genital syndrome                       | T99.13 |

*\*A patient with dementia, epilepsy and diabetes generates a score of 3*
